# Supplementary material
Source: Springer Nature journal article supplement (https://www.springermedizin.de/resource/supplementary/12958_2011_813_MOESM3_ESM.pdf/9568912)

Proliferative

Secretory

EP

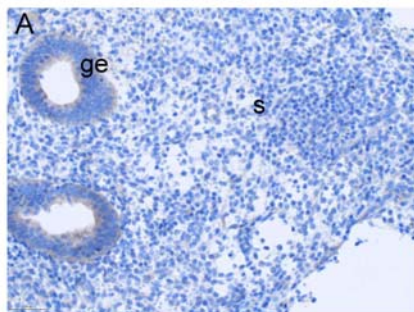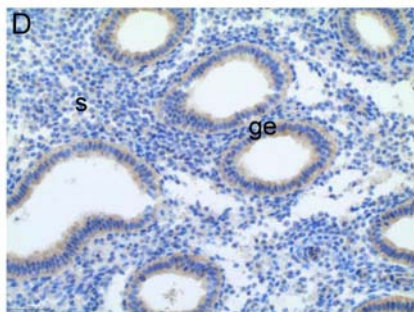

ES

MP

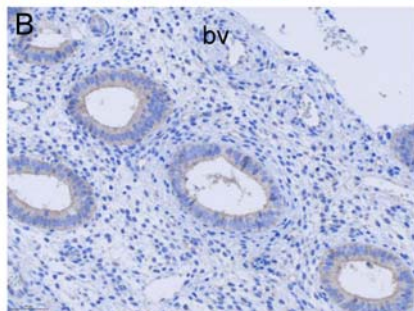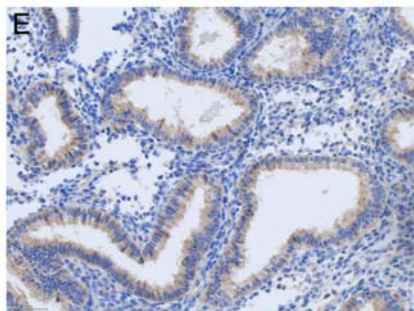

MS

LP

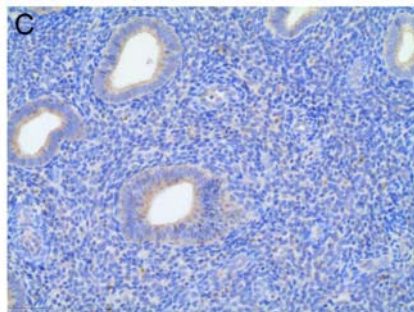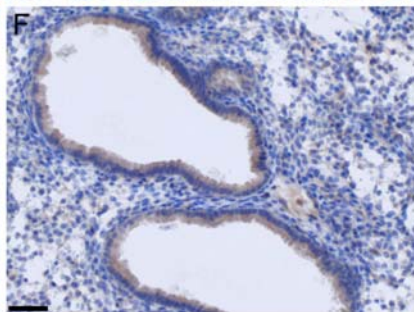

LS

Supplement: MOESM3 [file 9568912]
